# Supplementary material for: The fabrication of TiO2-supported clinoptilolite via F− contained hydrothermal etching and a resultant highly energetic {001} facet for the enhancement of its photocatalytic activity
Source: Royal Society of Chemistry journal article supplement (doi:10.1039/d1ra02269e), 2021-01-01
Supplement: d1ra02269e1.pdf [file d1ra02269e1.pdf]

# **Fabrication of TiO<sub>2</sub>-supported clinoptilolite via F<sup>-</sup> contained hydrothermal etching and resultant highly energetic {001} facet for enhancement of its photocatalytic activity**

Raza Ullah, Jihong Sun\*, Anadil Gul, Tallat Munir, Shiyang Bai\*

Beijing Key Laboratory for Green Catalysis and Separation, Department of Environmental and Chemical Engineering, Beijing University of Technology, Beijing 100124, P. R. China

## **Electronic Supporting Information**

### **Captions of Figures and Tables**

**Fig. S1.** Schematic illustration of the synthesis of TiO<sub>2</sub>/CPs.

**Fig. S2.** XRD patterns (A) of (a) ACP2, (b) ACP5, and (c) ACP7 and FT-IR spectra (B) of (a) ACP1, (b) ACP2, (c) ACP4, (d) ACP5, (e) ACP7, and (f) anatase TiO<sub>2</sub>.

**Fig. S3.** SEM images of (a) ACP2, (b) ACP5, and (c) ACP7.

**Fig. S4.** Pore size distribution curves of TiO<sub>2</sub>/CPs deriving from the desorption branch of the isotherms on the BJH model.

**Fig. S5.** Effect of various catalysts on the photo-catalytic degradation of CV (A) and MO (B) dyes. (a) ACP2, (b) ACP5, and (c) ACP7. Conditions: Initial concentration of dye = 0.0245 mM, catalyst dose = 0.5g/L, pH = 6.0, Room temperature.

**Fig. S6.** Effect of UV-light alone (a and c), and bare CP (b and d) on the degradation of CV (a and b) and MO (c and d) dyes, respectively.

**Fig. S7.** A: Effect of irradiation time on the photo-catalytic degradation of CV (a) and MO (b) dyes. B: UV-Vis absorbance spectra of CV. C: UV-Vis absorbance spectra of MO at different irradiation time intervals, catalyzed by ACP6. Conditions: Initial concentration of dye = 0.0245 mM, catalyst dose = 0.75 g/L, pH = 8.0, Time = 120 min, and Room temperature.

**Fig. S8.** Effect of radicals scavengers on the photocatalytic degradation of CV and MO dyes, a: CV degradation without scavengers, b: MO degradation without scavengers, c: CV degradation in the presence of isopropyl alcohol, d: MO degradation in the

presence of isopropyl alcohol, e: CV degradation in the presence of benzoquinine, and f: MO degradation in the presence of benzoquinine.

**Fig. S9.** Proposed degradation mechanisms of (a) CV and (b) MO dyes.

**Table S1.** Crystallinity of loaded  $\text{TiO}_2$  and CP supports and ratio of the high energy {004} and low energy {101} facet.

**Table S2.** Pseudo-first order rate constant of CV and MO dyes using different kinds of catalysts.

**Table S3.** Observed rate constants and degradation (%) of CV and MO dyes using ACP6 as photocatalyst at different initial concentration of the dyes.

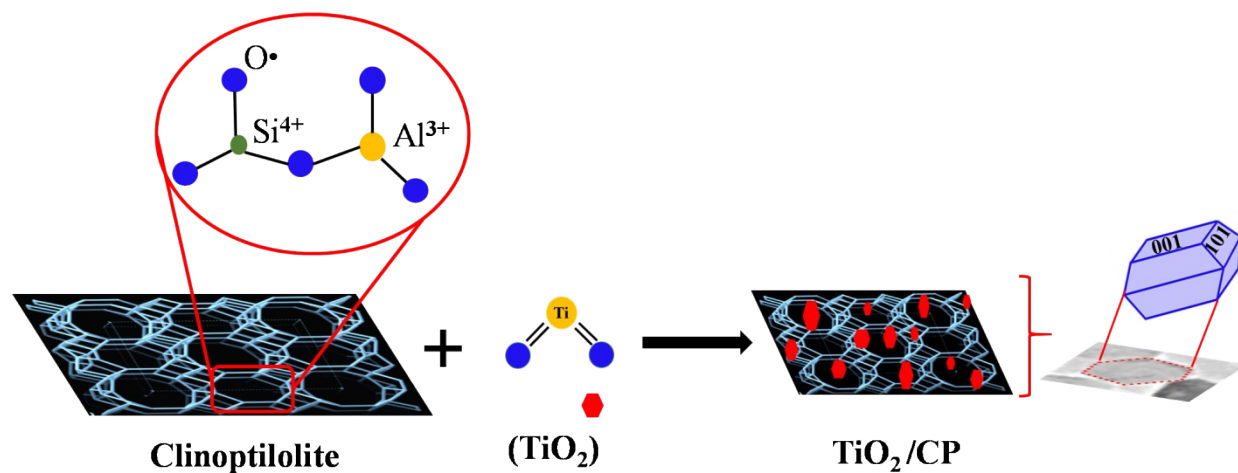

**Fig. S1.** Schematic illustration of the synthesis of TiO<sub>2</sub>/CPs.

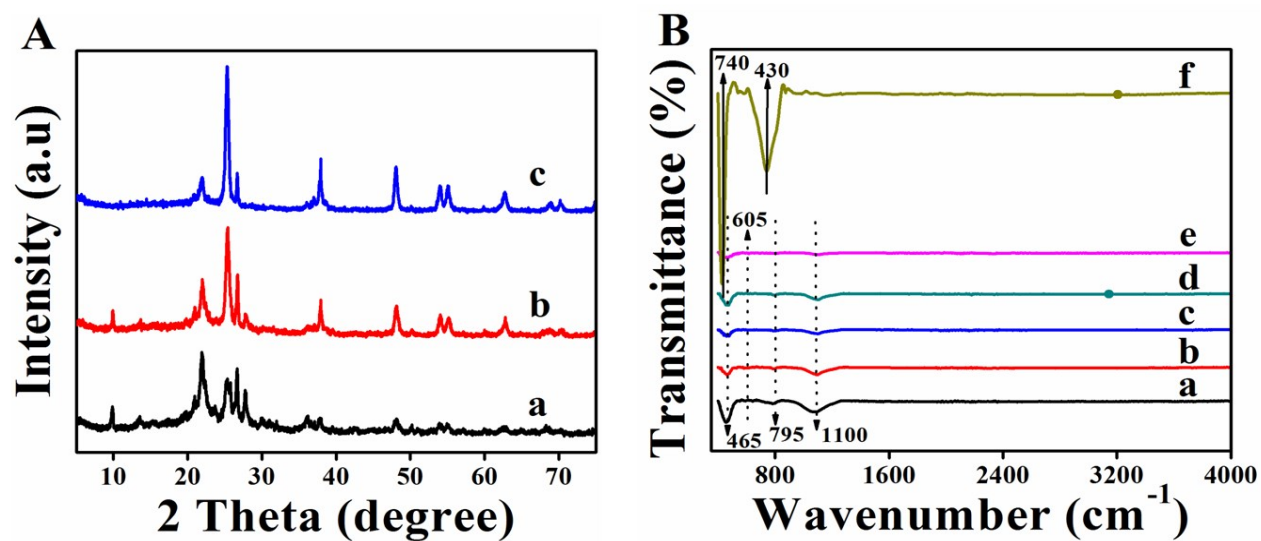

**Fig. S2.** XRD patterns (A) of (a) ACP2, (b) ACP5, and (c) ACP7 and FT-IR spectra (B) of (a) ACP1, (b) ACP2, (c) ACP4, (d) ACP5, (e) ACP7, and (f) anatase TiO<sub>2</sub>.

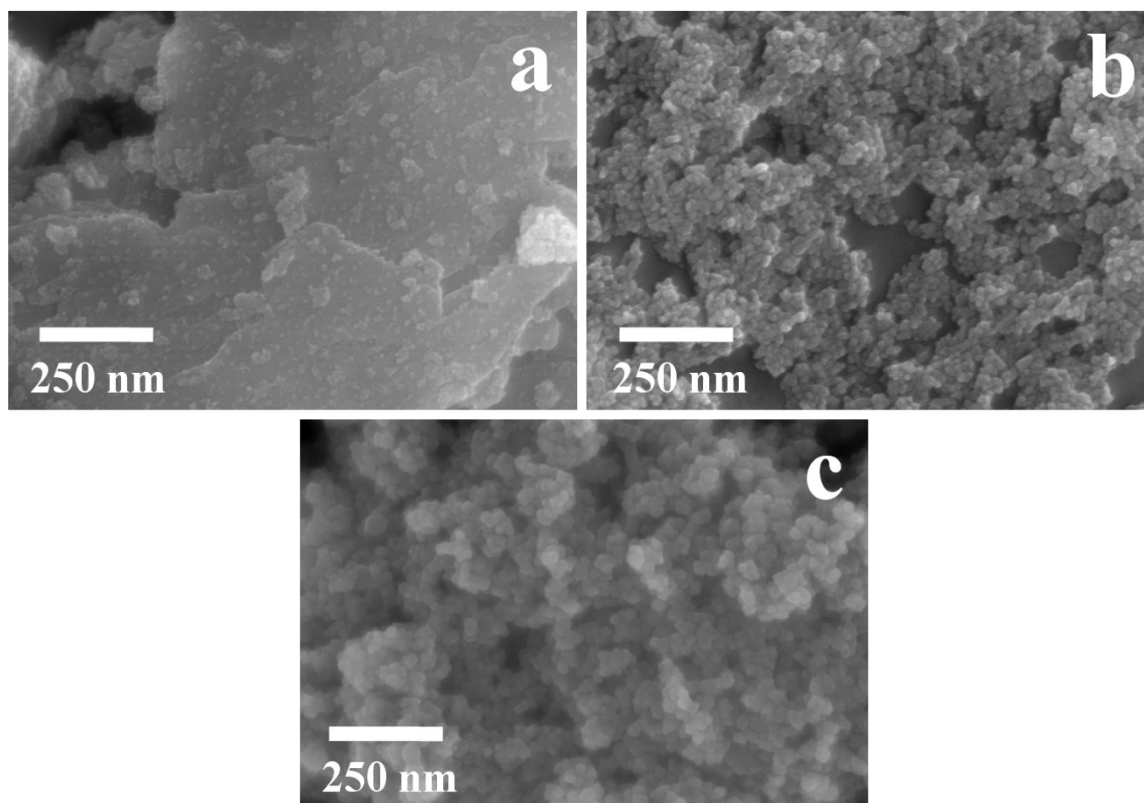

**Fig. S3.** SEM images of (a) ACP2, (b) ACP5, and (c) ACP7.

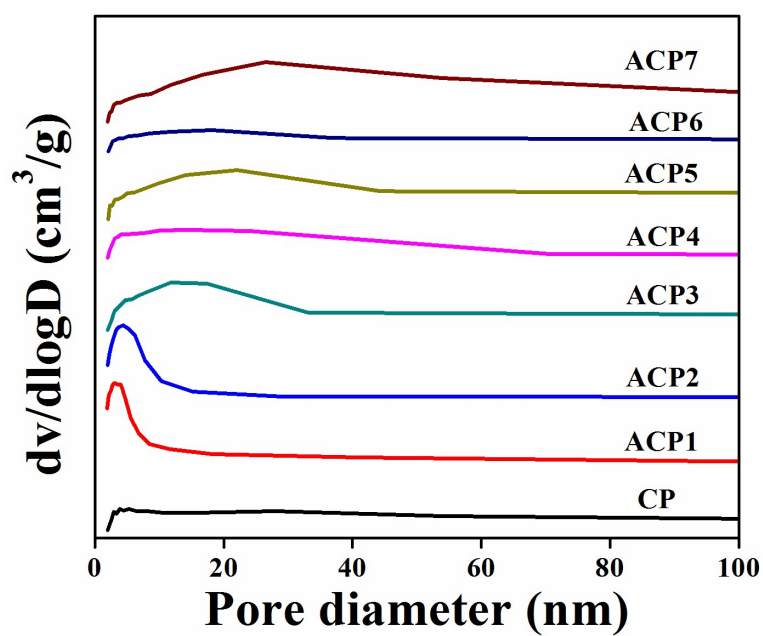

**Fig. S4.** Pore size distribution curves of  $\text{TiO}_2/\text{CPs}$  deriving from the desorption branch of the isotherms on the BJH model.

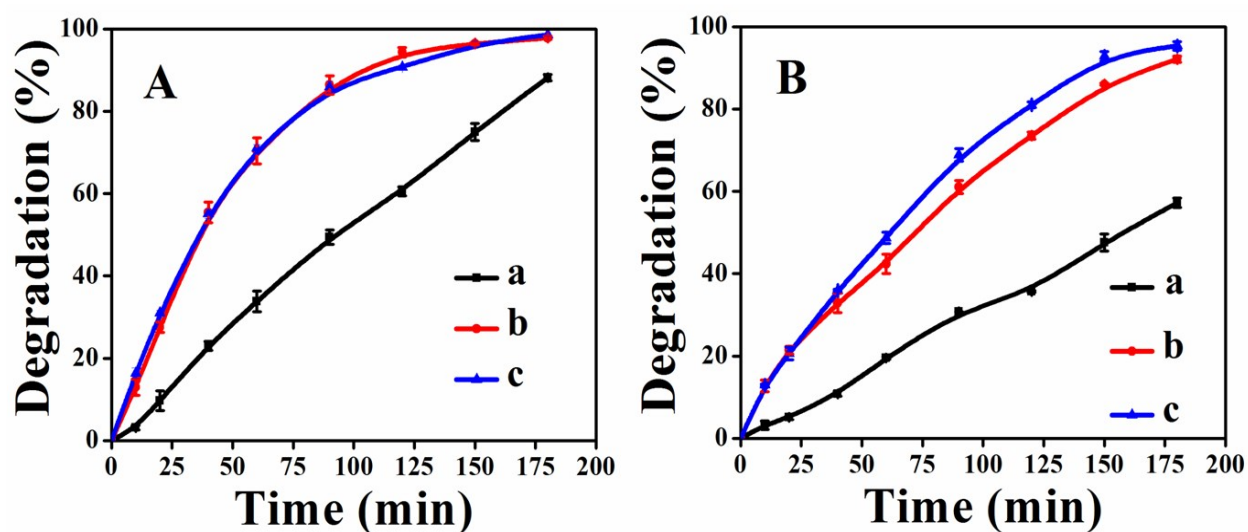

**Fig. S5.** Effect of various catalysts on the photo-catalytic degradation of CV (A) and MO (B) dyes. (a) ACP2, (b) ACP5, and (c) ACP7. Conditions: Initial concentration of dye = 0.0245 mM, catalyst dose = 0.5g/L, pH = 6.0, Room temperature.

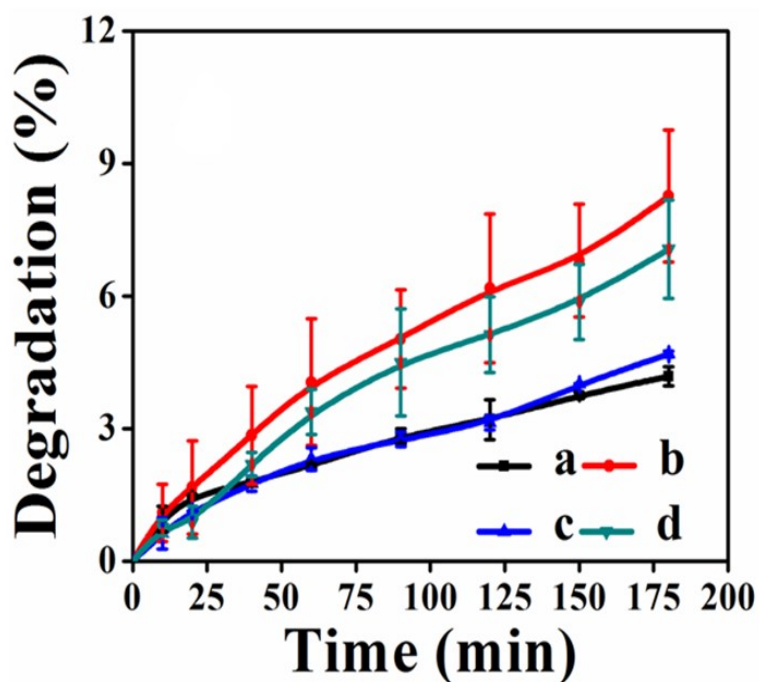

**Fig. S6.** Effect of UV-light alone (a and c), and bare CP (b and d) on the degradation of CV (a and b) and MO (c and d) dyes, respectively.

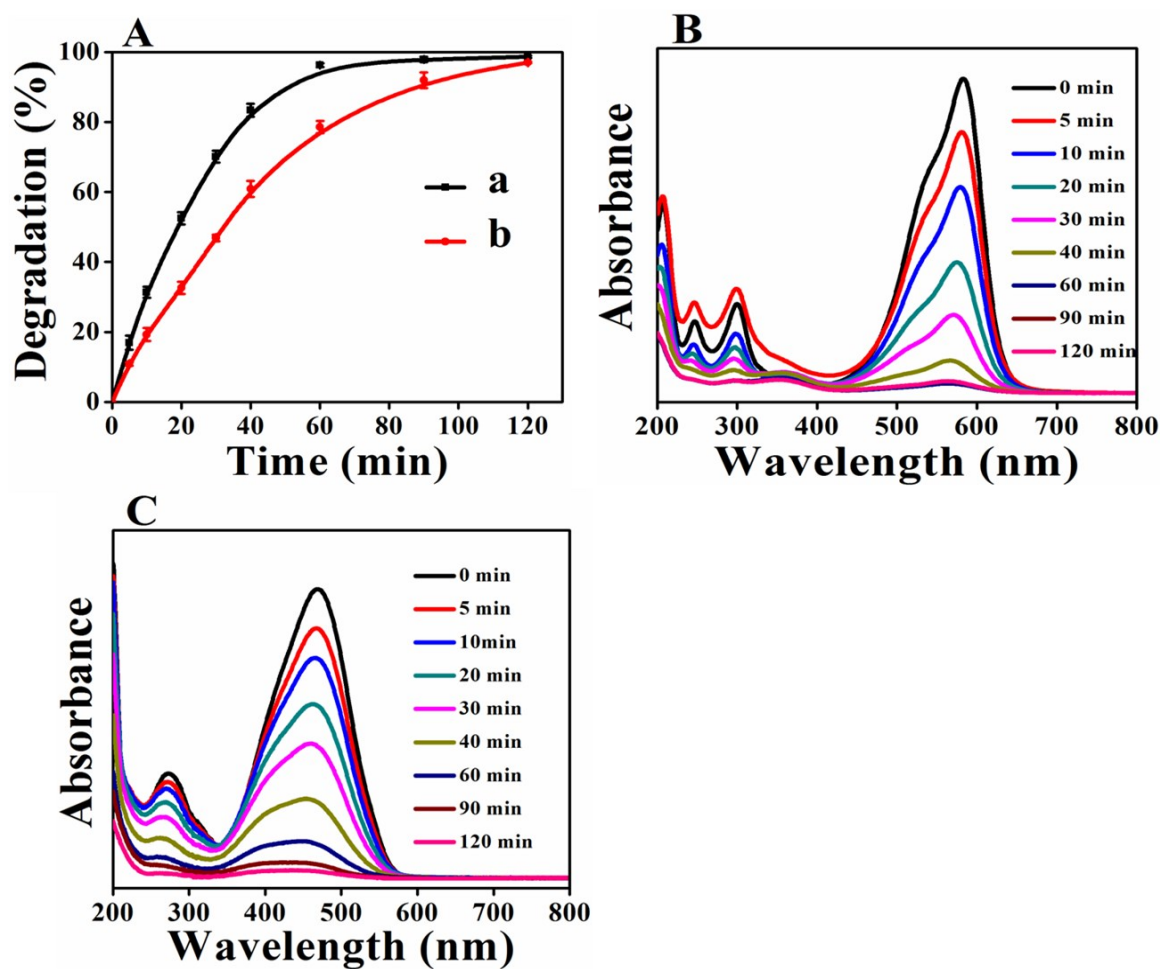

**Fig. S7.** A: Effect of irradiation time on the photo-catalytic degradation of CV (a) and MO (b) dyes. B: UV-Vis absorbance spectra of CV. C: UV-Vis absorbance spectra of MO at different irradiation time intervals, catalyzed by ACP6. Conditions: Initial concentration of dye = 0.0245 mM, catalyst dose = 0.75 g/L, pH = 8.0, Time = 120 min, and Room temperature.

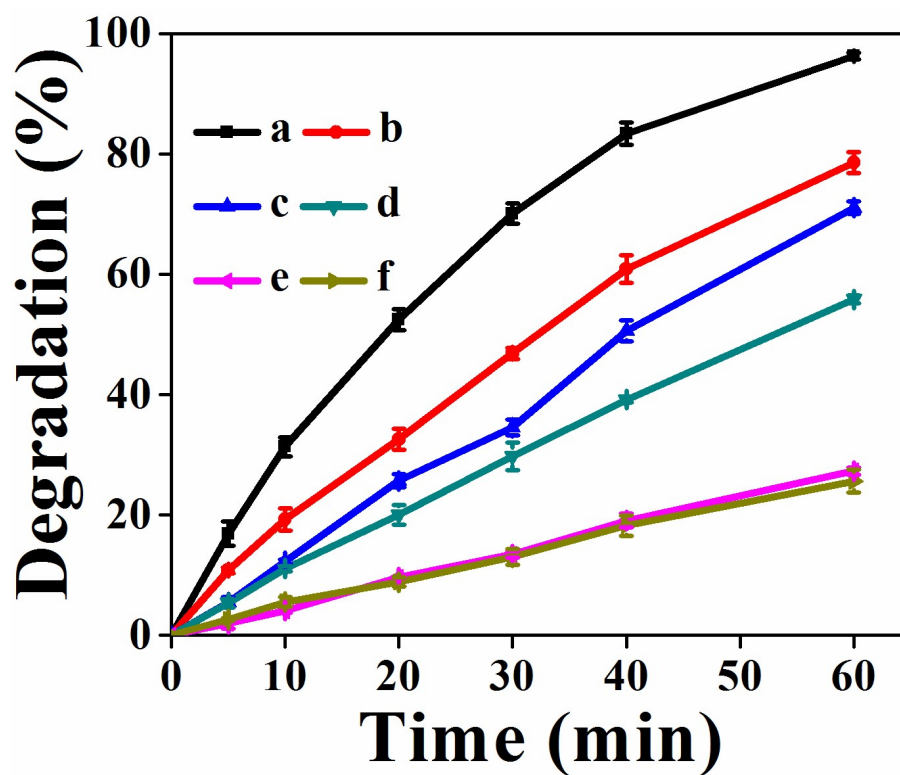

**Fig. S8.** Effect of radicals scavengers on the photocatalytic degradation of CV and MO dyes, a: CV degradation without scavengers, b: MO degradation without scavengers, c: CV degradation in the presence of isopropyl alcohol, d: MO degradation in the presence of isopropyl alcohol, e: CV degradation in the presence of benzoquinine, and f: MO degradation in the presence of benzoquinine.

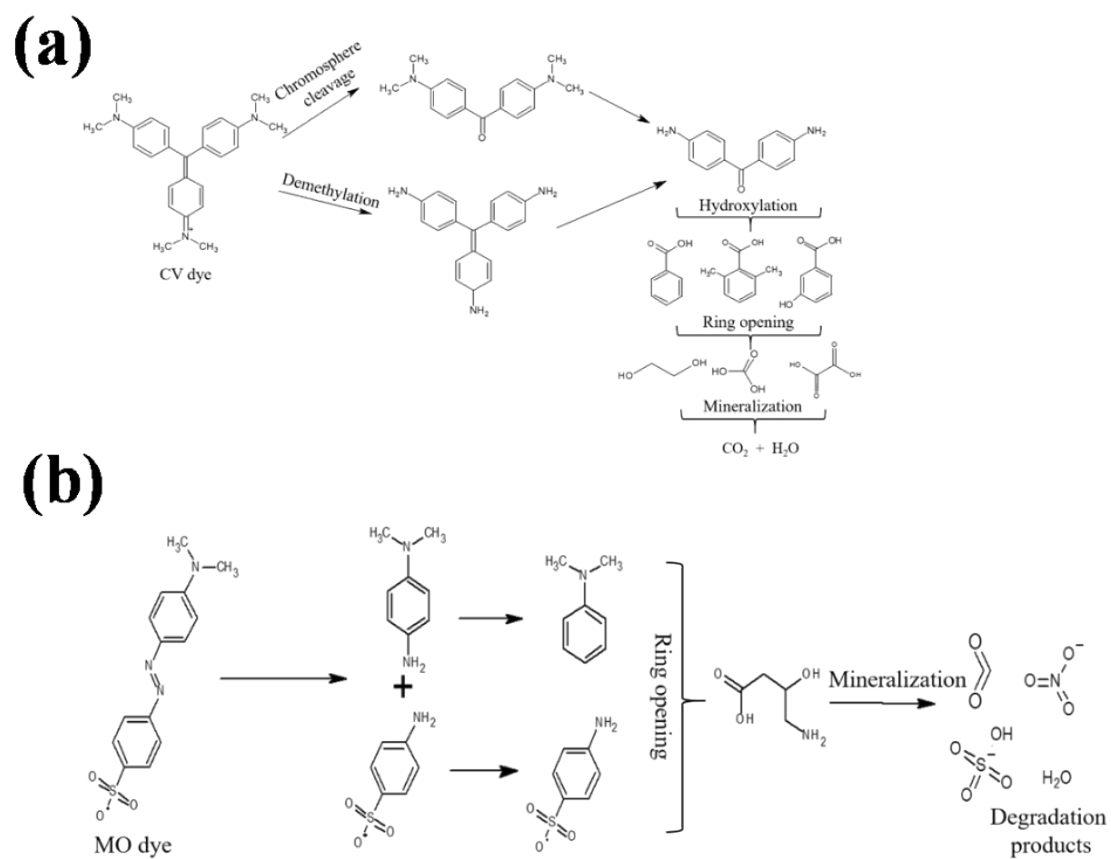

**Fig. S9.** Proposed degradation mechanisms of (a) CV and (b) MO dyes.

**Table S1.** Crystallinity of loaded TiO<sub>2</sub> and CP supports and ratio of the high energy {004} and low energy {101} facet.

| Sample           | Crystallinity (%) of loaded TiO <sub>2</sub><br>inTiO <sub>2</sub> /CP | $I_{004}/I_{101}$ | Crystallinity (%) of CP |
|------------------|------------------------------------------------------------------------|-------------------|-------------------------|
| CP               | -                                                                      | -                 | 100                     |
| ACP1             | 37.90                                                                  | 0.26              | 48.10                   |
| ACP2             | 42.13                                                                  | 0.24              | 61.39                   |
| ACP3             | 52.04                                                                  | 0.28              | 58.62                   |
| ACP4             | 54.33                                                                  | 0.32              | 46.31                   |
| ACP5             | 68.36                                                                  | 0.36              | 46.31                   |
| ACP6             | 77.53                                                                  | 0.38              | 45.33                   |
| ACP7             | 83.74                                                                  | 0.38              | 27.08                   |
| TiO <sub>2</sub> | 100                                                                    | 0.30              | -                       |

**Table S2.** Pseudo-first order rate constant of CV and MO dyes using different kinds of catalysts.

| Catalyst type    | CV                             |       | MO                             |       |
|------------------|--------------------------------|-------|--------------------------------|-------|
|                  | $k_{app}$ (min <sup>-1</sup> ) | $R^2$ | $k_{app}$ (min <sup>-1</sup> ) | $R^2$ |
| ACP1             | 0.007                          | 0.996 | 0.004                          | 0.999 |
| ACP2             | 0.007                          | 0.990 | 0.003                          | 0.975 |
| ACP3             | 0.008                          | 0.985 | 0.004                          | 0.989 |
| ACP4             | 0.016                          | 0.996 | 0.008                          | 0.994 |
| ACP5             | 0.021                          | 0.994 | 0.008                          | 0.986 |
| ACP6             | 0.022                          | 0.998 | 0.012                          | 0.999 |
| ACP7             | 0.020                          | 0.998 | 0.010                          | 0.995 |
| TiO <sub>2</sub> | 0.015                          | 0.994 | 0.008                          | 0.995 |

**Table S3.** Observed rate constants and degradation (%) of CV and MO dyes using ACP6 as photocatalyst at different initial concentration of the dyes.

| Dye | Dye concentration (mM) | Degradation (%) | $k_{app}$ (min <sup>-1</sup> ) | $R^2$ |
|-----|------------------------|-----------------|--------------------------------|-------|
| CV  | 0.0122                 | 94              | 0.069                          | 0.993 |
|     | 0.0245                 | 77              | 0.037                          | 0.988 |
|     | 0.0368                 | 62              | 0.024                          | 0.992 |
|     | 0.0490                 | 51              | 0.017                          | 0.987 |
| MO  | 0.0122                 | 76              | 0.035                          | 0.991 |
|     | 0.0245                 | 61              | 0.026                          | 0.984 |
|     | 0.0368                 | 43              | 0.014                          | 0.984 |
|     | 0.0490                 | 31              | 0.010                          | 0.977 |
